# Supplementary material for: Enhanced Cypermethrin Degradation Kinetics and Metabolic Pathway in Bacillus thuringiensis Strain SG4
Source: PubMed Central journal article supplement (PMC7074683; doi:10.3390/microorganisms8020223), 2020-02-07
Supplement: microorganisms-08-00223-s001.pdf [file microorganisms-08-00223-s001.pdf]

## Supplementary data

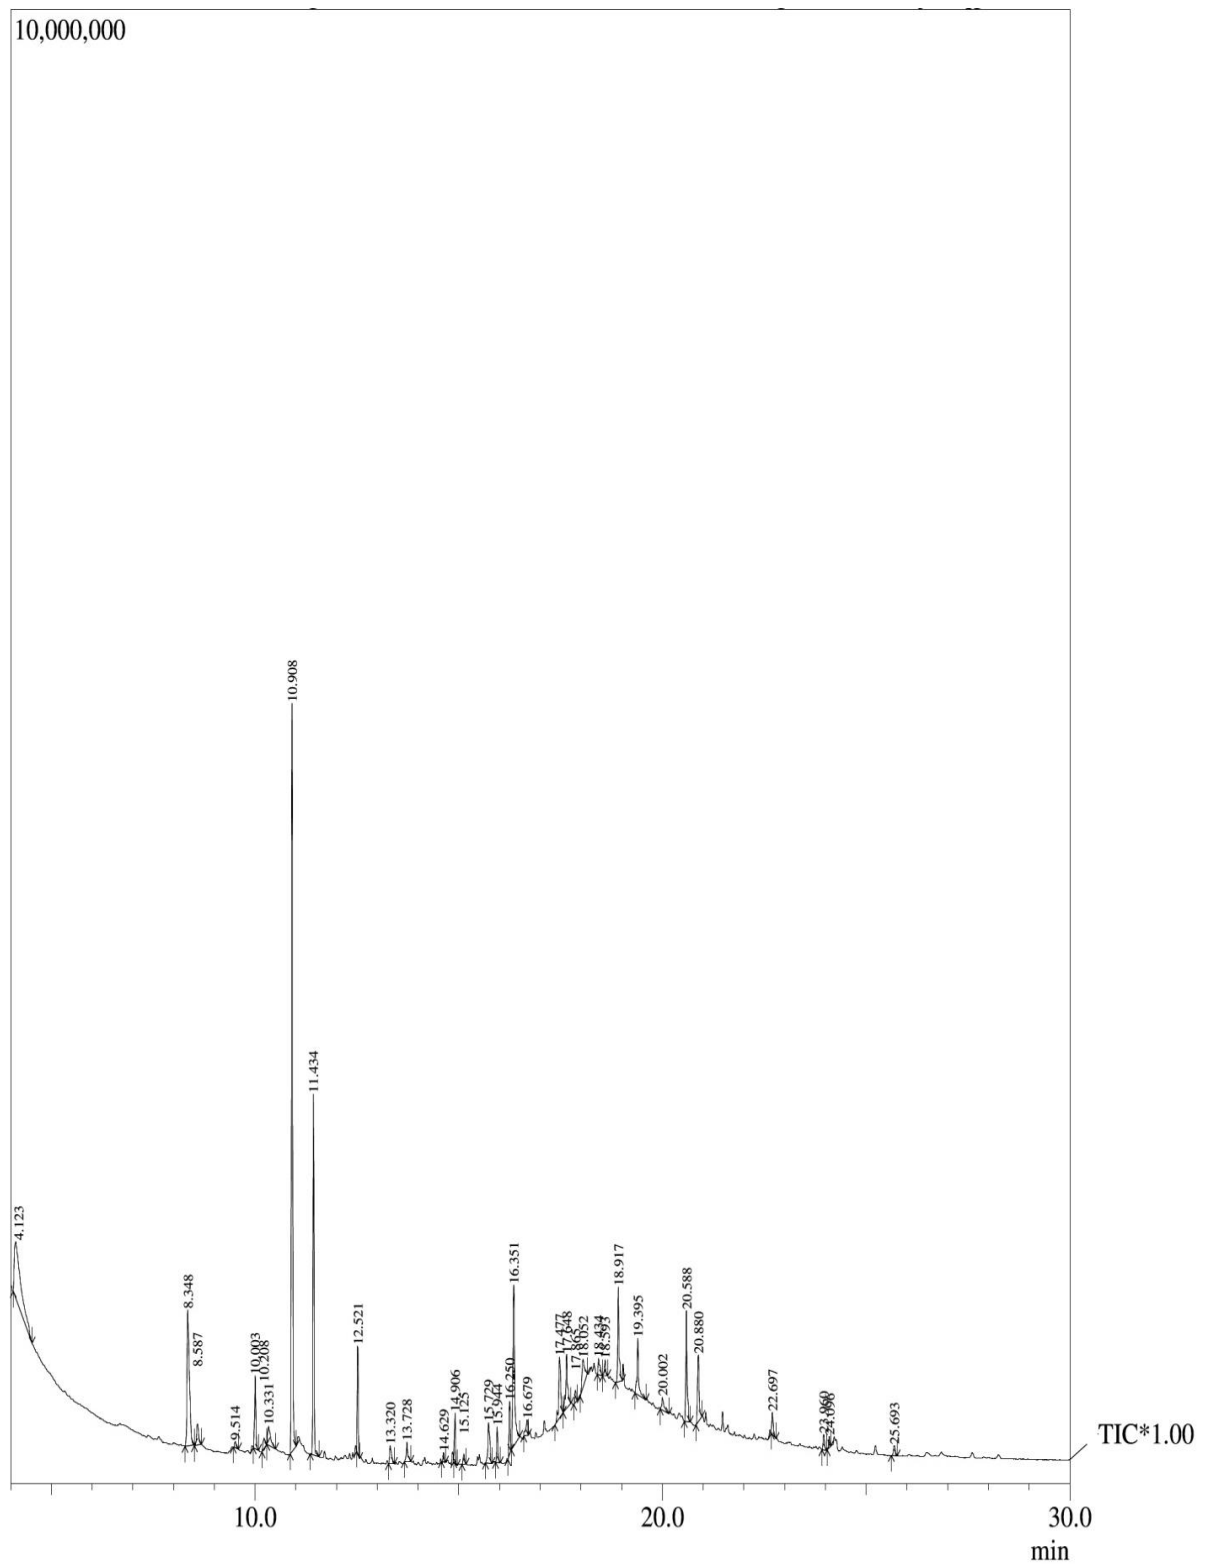

**Figure S1.** GC-MS chromatogram of cypermethrin with *Bacillus thuringiensis* strain SG4.

**Table S1.** Morphological and biochemical characteristics of *Bacillus thuringiensis* strain SG4.

| Morphological and Biochemical Test | Response |
|------------------------------------|----------|
| Gram reaction                      | +        |
| Catalase                           | +        |

|                        |           |
|------------------------|-----------|
| Gelatin liquefaction   | -         |
| Lipase                 | -         |
| Siderophore production | +         |
| P-solubilization       | +         |
| IAA production         | +         |
| Cell shape             | Rods      |
| Arrangement            | Scattered |
